# Supplementary material
Source: Research Square preprint supplement (doi:10.21203/rs.3.rs-9368458/v1)
Supplement: Supplementary file 1 [file d4ff86aa909eb97f3adea98f.docx]

**Supplementary Material**

**Appendix 1** List of families, species and life forms of natural regeneration recorded in the flooded forests of várzea and igapó of the Ferreira Penna Scientific Station, Caxiuanã, Pará, Brazil

| **Family** | **Scientific name** | **Life form** | **Várzea** | **Igapó** | **Total** |
| --- | --- | --- | --- | --- | --- |
| Anacardiaceae | *Tapirira guianensis* Aubl. | tree | 1 |  | 1 |
| Annonaceae | *Guatteria schomburgkiana* Mart. | tree | 1 |  | 1 |
|  | *Xylopia emarginata* Mart. | tree |  | 4 | 4 |
| Apocynaceae | *Aspidosperma excelsum* Benth. | tree |  | 1 | 1 |
|  | *Aspidosperma carapanauba* Pichon | tree |  | 3 | 3 |
|  | *Odontadenia nitida* (Vahl) Müll.Arg. | vine | 10 | 18 | 28 |
| Araceae | *Dieffenbachia picta* Schott | herb | 6 |  | 6 |
|  | *Monstera adansonii* (Schott) | tree |  | 5 | 5 |
|  | *Monstera Adans.* | tree |  | 1 | 1 |
|  | *Montrichardia linifera* (Arruda) Schott | tree | 29 |  | 29 |
|  | *Montrichardia arborescens* (L.) Schott. | tree |  | 79 | 79 |
|  | *Philodendron muricatum* Willd. ex Schott. | epiphyte | 22 |  | 22 |
|  | *Philodendron* Schott | epiphyte | 9 |  | 9 |
|  | *Urospatha caudata* (Poepp.) Schott | herb | 8 | 1 | 9 |
|  | *Urospatha sagittifolia* (Rudge) Schott. | herb | 3 |  | 3 |
| Arecaceae | *Bactris* Jacq. ex Scop. | palm | 1 | 1 | 2 |
|  | *Euterpe oleracea* Mart. | palm | 114 |  | 114 |
|  | *Mauritia flexuosa* L.f. | palm | 50 |  | 50 |
| Bignoniaceae | *Adenocalymma magnificum* Mart. ex DC. | vine | 1 |  | 1 |
|  | *Bignonia aequinoctialis* L. | vine |  | 5 | 5 |
| Chrysobalanaceae | *Licania licaniiflora* (Sagot) Blake | tree | 5 | 6 | 11 |
| Clusiaceae | *Caraipa grandifolia* Mart. | tree | 4 | 20 | 24 |
|  | *Caryocar microcarpum* Ducke | tree |  | 1 | 1 |
|  | *Symphonia globulifera* L.f. | tree | 6 | 6 | 12 |
|  | *Tovomita brasiliensis* (Mart.) Walp. | shrub | 7 |  | 7 |
| Combretaceae | *Combretum cacoucia* Exell. | vine | 5 | 5 | 10 |
|  | *Combretum laurifolium* Mart. | vine | 1 | 1 | 2 |
| Cyperaceae | *Becquerelia* Brongn. | herb | 7 |  | 7 |
|  | *Becquerelia cymosa* Brongn. | herb |  | 47 | 47 |
|  | *Bredemeyera* Willd. | herb |  | 1 | 1 |
|  | *Calyptrocarya glomerulata* (Brongn.) Urb. | herb | 1 |  | 1 |
|  | *Diplasia karatifolia* Rich. in Pers. | herb |  | 1 | 1 |
|  | *Rhynchospora pubera* (Vahl) Boeckeler | herb |  | 20 | 20 |
| Dilleniaceae | *Doliocarpus dentatus* (Aubl.) Standl. | vine | 13 | 6 | 19 |
| Ebertaceae | *Diospyros guianensis* (Aubl.) Gürke | tree |  | 7 | 7 |
| Elaeocarpaceae | *Sloanea guianensis* (Aubl.) Benth. | tree | 8 |  | 8 |
| Euphorbiaceae | *Hevea brasiliensis* L. | tree | 9 |  | 9 |
| Fabaceae | *Crudia amazonica* Spruce ex Benth. | tree | 9 |  | 9 |
|  | *Cynometra bauhiniifolia* Benth. | tree | 54 |  | 54 |
|  | *Dalbergia monetaria* L.f. | Vine | 11 | 8 | 19 |
|  | *Hydrochorea corymbosa* (Rich.) Barneby & J.W.Grimes | tree | 7 |  | 7 |
|  | *Machaerium quinata* (Aubl.) Sandwith. | Vine | 1 |  | 1 |
|  | *Machaerium* Pers. sp 1 | Vine |  | 1 | 1 |
|  | *Machaerium* Pers. sp 2 | Vine |  | 8 | 8 |
|  | *Macrolobium angustifolium* (Benth.) R.S.Cowan. | tree | 34 | 15 | 49 |
|  | *Macrosamanea pubiramea* (Steud.) Barneby & J.W.Grimes | Vine |  | 6 | 6 |
|  | *Pentaclethra macroloba* (Willd.) Kuntze | tree | 1 |  | 1 |
|  | *Pterocarpus santalinoides* L Hér. ex DC. LC | tree | 26 | 9 | 35 |
|  | *Swartzia acuminata* Willd. ex Vogel) | Tree | 8 | 14 | 22 |
|  | *Swartzia racemosa* Benth. | Tree | 2 | 2 | 4 |
|  | *Taralea oppositifolia* Aubl. | Tree | 3 | 5 | 8 |
|  | *Vatairea guianensis* Aubl. | Tree | 2 | 1 | 3 |
|  | *Zygia ramiflora* (Benth.) Barneby & J.W.Grimes | Tree | 25 |  | 25 |
| Heminophyllaceae | *Trichomanes pinnatum* Hedw. | herb |  | 105 | 105 |
| Lauraceae | *Ocotea* Aubl. | Tree |  | 1 | 1 |
| Lecythidaceae | *Allantoma lineata* (Mart. ex O.Berg) Miers. | Tree |  | 2 | 2 |
|  | *Gustavia hexapetala* (Aubl.) Sm. | Tree | 6 |  | 6 |
| Malpighiaceae | *Tetrapterys* Cav. | Vine | 2 |  | 2 |
| Malvaceae | *Pachira aquatica* Aubl. | Tree | 2 |  | 2 |
| Marantaceae | *Ischnosiphon polyphyllus* (Poepp. & Endl.) Körn. | Herb | 8 | 28 | 36 |
| Melastomataceae | *Tococa* Aubl. | shrub |  | 1 | 1 |
| Moraceae | *Maquira guianensis* Aubl. | Tree | 2 |  | 2 |
| Myristicaceae | *Virola surinamensis* (Rol. ex Rottb.) Warb. | Tree | 79 | 13 | 92 |
| Myrtaceae | *Eugenia* L. | Shrub | 1 | 1 | 2 |
|  | *Myrciaria tenella* (DC.) O. Berg | Tree |  | 1 | 1 |
| Olacaceae | *Dulacia candida* (Poepp.) Kuntze. | Tree | 1 |  | 1 |
|  | *Heisteria scandens* Ducke | Vine | 2 |  | 2 |
| Orchidaceae | *Vanilla palmarum* (Salzm. ex Lindl.) Lindl. | epiphyte | 1 |  | 1 |
| Poaceae | *Olyra* L. | Herb |  | 12 | 12 |
| Polygalaceae | *Moutabea guianensis* Aubl. | Vine | 1 |  | 1 |
| Polygonaceae | *Coccoloba* P.Browne | Vine |  | 1 | 1 |
| Rapateaceae | *Rapatea paludosa* Aubl. | Herb |  | 60 | 60 |
| Rubiaceae | *Palicourea* Aubl. | Shrub |  | 1 | 1 |
| Vochysiaceae | *Erisma calcaratum* (Link) Warm. | Tree | 8 |  | 8 |
|  | *Erisma uncinatum* Warm | Tree |  | 19 | 19 |
|  | *Qualea acuminata* Spruce ex Warm. | Tree | 2 | 13 | 15 |
| **Total** |  |  | **619** | **566** | **1185** |
